# Supplementary material
Source: ML conference proceedings conference paper supplement (https://aclanthology.org/2023.inlg-main.8)
Supplement: Supplementary_Attachment [file 2023.inlg-main.8.Supplementary_Attachment.pdf]

## A Prompt Design for ChatGPT-based Evaluation

The prompt templates are shown in Figure 5.

**Listing the facts of a graph:** Here we give ChatGPT an input linearized graph and ask it to “list the features one by one from the INPUT” (Figure 5-Left). Figure 6 shows an example of this prompt to ChatGPT and its response for a sample from the House test set. ChatGPT has made no error in all 50 test samples of House data.

**Listing the common facts:** ChatGPT was unable to correctly list the common facts between the linearized input graph and the generated text. Hence, we prompt ChatGPT for each fact listed in the input, whether that fact is included in the output. Here, each fact (or “feature”) represents a single triple of the input linearized graph (Figure 5-Middle). Then, we count the answer with a “yes” response from ChatGPT. On average, ChatGPT makes 2-3 mistakes per sample. Figure 7 shows an example of this prompt and ChatGPT’s response. The red colored text indicates the mistakes done by ChatGPT.

**Listing the hallucinated facts:** Here, we prompt ChatGPT to list both the extrinsic and intrinsic hallucination facts in the generated text by providing ChatGPT with an input (linearized graph) and an output (generated text). Firstly, to list the extrinsic hallucination facts we instruct ChatGPT to “List the features one by one from the OUTPUT that is not mentioned in the INPUT”. Secondly, to list the intrinsic hallucination facts we instruct ChatGPT to “List the features one by one from the OUTPUT that is contradictory to the INPUT” (Figure 5-Right). Here, ChatGPT makes no mistakes in the 50 House test samples. Figure 8 illustrates the steps with an example and ChatGPT’s response.

## B Comparing Our Result with ChatGPT

We randomly take 1000 sample graphs from the House dataset. Our experiments are conducted using the API of ChatGPT (gpt-3.5-turbo) model. We input ChatGPT the sample graphs in a linearized format and asked to summarize the linearized graphs in a real-estate advertising format. We experiment with ChatGPT-ZeroShot (without giving any reference text), ChatGPT- $k$ -FewShot, (where  $k$  represents the number of noisy ground-truth text sample is given to ChatGPT as a refer-

ence in addition to the input linearized graph) and compare these with our full model.

Table 4 shows that in terms of faithfulness metrics (BARTScore), ChatGPT-ZeroShot has the best performance. This is because, ChatGPT is a large model and ChatGPT-ZeroShot generates text without taking any noisy ground-truth text as a reference. Whereas, our model is a small (BART-base/T5-base) language model and the model is trained with the full noisy training House dataset. We also notice that the performance of ChatGPT- $k$ -FewShot drops with the increase of number of noisy reference text samples. Thus, the more we increase the number of noisy ground-truth texts as a reference to ChatGPT, the more ChatGPT generates hallucinated text similar to ground-truth text. That’s why the BLEU, METEOR and ROUGE-L scores increase and BARTscore, FactCC scores decrease with the increase of few shot samples.

We also compare the results using ChatGPT-based evaluation. Table 5 shows the average of precision, recall and hallucinations which we compute using ChatGPT. The results also show that ChatGPT-ZeroShot performs best in all metrics as usual. Our model outperforms ChatGPT-3-FewShot in terms of precision (higher precision) and hallucination (lower hallucination).

**Performance Based on Salient Facts:** We rank in descending order the features (type-wise) of the house graph based on their frequency of occurrence in the House training dataset. We take top ten features as *salient* facts. The salient facts are: 1) house\_location, 2) house\_property-type, 3) num. of bedrooms, 4) num. of bathrooms, 5) num of parking spaces, 6) has\_ac, 7) has\_dining, 8) has\_heating, 9) has\_garage\_spaces and 10) nearest\_train\_station. Using ChatGPT, we enumerate the presence of these facts and measure salient precision,  $P_{salient}$  and salient recall,  $R_{salient}$  as follows.

$$P_{salient} = \frac{\# \text{ salient common facts}}{\# \text{ output facts}} \quad (4)$$

$$R_{salient} = \frac{\# \text{ salient common facts}}{\# \text{ salient input facts}} \quad (5)$$

The results from Table: 6 shows that our model achieves the best average salient precision,  $P_{salient}$ , and ChatGPT-ZeroShot achieves the best average salient recall. The reason behind this result is that ChatGPT-ZeroShot generated output text contains mostly all the facts from the input graph, whereas

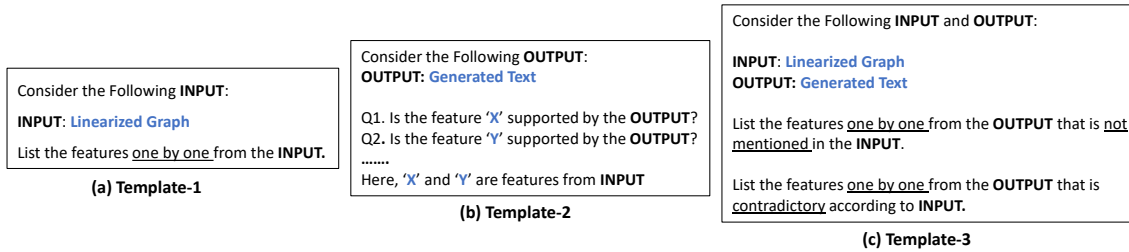

Figure 5: Prompt templates for enumerating facts using ChatGPT. Template-1 (left) is to enumerate facts in the input (linearized graph). Template-2 (middle) is to enumerate common facts between the input (linearized graph) and the output (generated text). Template-3 (right) is to enumerate hallucinated facts in the output (generated text).

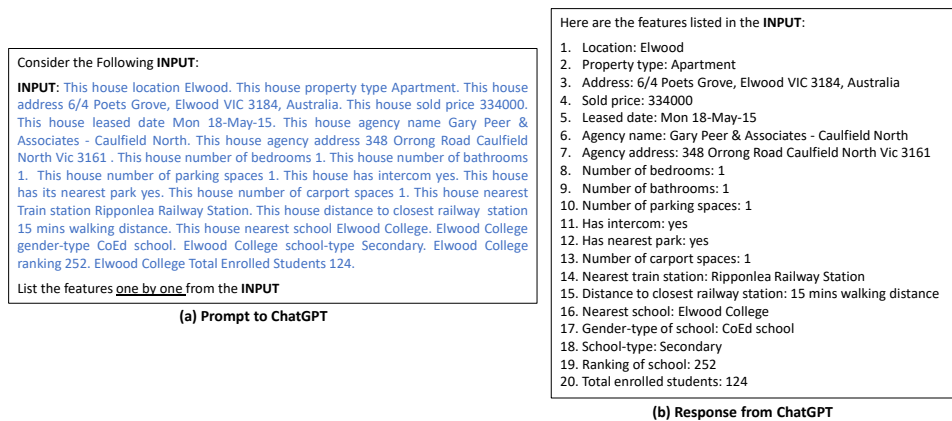

Figure 6: An Example of Template-1

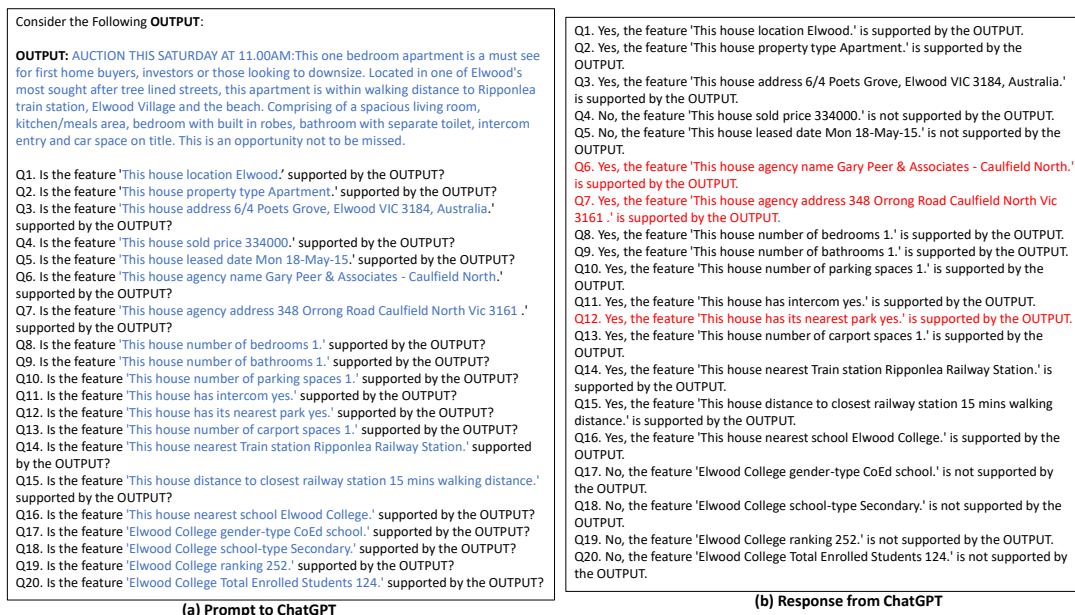

Figure 7: An Example of Template-2

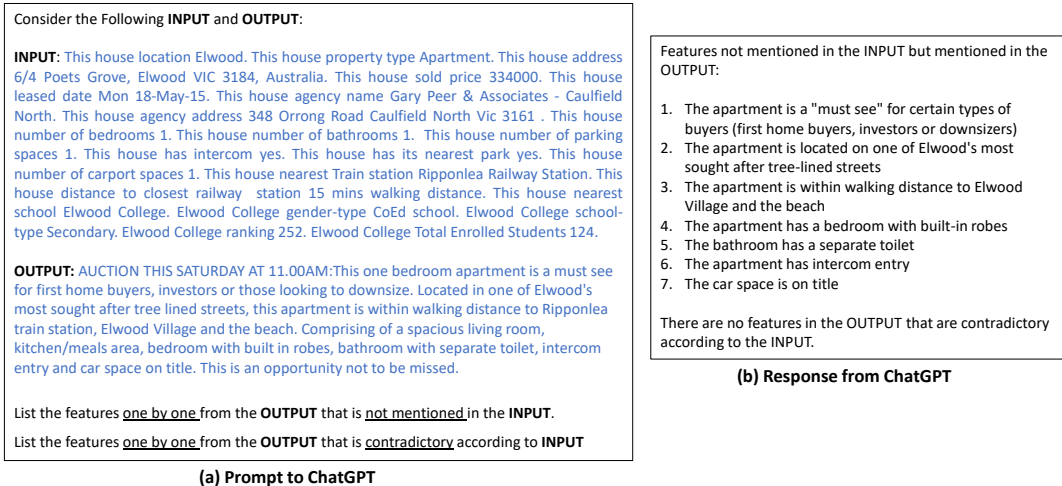

Figure 8: An Example of Template-3

| Generation Model      | Comparison with ground-truth text |              |              | Comparison with linearized graph |              |
|-----------------------|-----------------------------------|--------------|--------------|----------------------------------|--------------|
|                       | BLEU ↑                            | METEOR ↑     | ROUGE-L ↑    | BARTScore ↑                      | FactCC ↑     |
| ChatGPT-ZeroShot      | 1.21                              | 11.86        | 12.91        | <b>-2.389</b>                    | 71.02        |
| ChatGPT-1-Shot        | 1.95                              | 12.73        | 15.02        | -2.872                           | <b>76.34</b> |
| ChatGPT-2-Shot        | 2.06                              | 12.67        | 15.58        | -2.937                           | 72.02        |
| ChatGPT-3-Shot        | 2.25                              | <b>13.31</b> | 15.76        | -3.036                           | 73.88        |
| <b>Our Full Model</b> | <b>2.68</b>                       | 11.21        | <b>17.10</b> | -3.246                           | 62.84        |

Table 4: Results on 1000 test samples from the House dataset. **Bold** fonts denote the best results.

| Generation Model      | Avg. Precision | Avg. Recall  | Avg. Hallucination |
|-----------------------|----------------|--------------|--------------------|
| ChatGPT-ZeroShot      | <b>73.28</b>   | <b>88.21</b> | <b>26.71</b>       |
| ChatGPT-3-Shot        | 65.45          | 64.39        | 34.55              |
| <b>Our Full Model</b> | 67.06          | 58.81        | 32.94              |

Table 5: ChatGPT Evaluation Results based on 50 samples from the House Dataset. **Bold** fonts denote the best results.

our model generated output text gives more focus on the salient facts.

### C Generated Samples

Figure 9 and Figure 10 show qualitative examples of sample graphs, the ground-truth texts and the texts generated by different models on House dataset and Genwiki dataset, respectively.

| Generation Model      | Avg. Salient Precision | Avg. Salient Recall |
|-----------------------|------------------------|---------------------|
| ChatGPT-ZeroShot      | 26.75                  | <b>92.66</b>        |
| ChatGPT-3-FewShot     | 30.27                  | 86.36               |
| <b>Our Full Model</b> | <b>31.64</b>           | 77.16               |

Table 6: ChatGPT Evaluation Results based on 50 samples from the House dataset considering salient features. **Bold** fonts denote the best results.

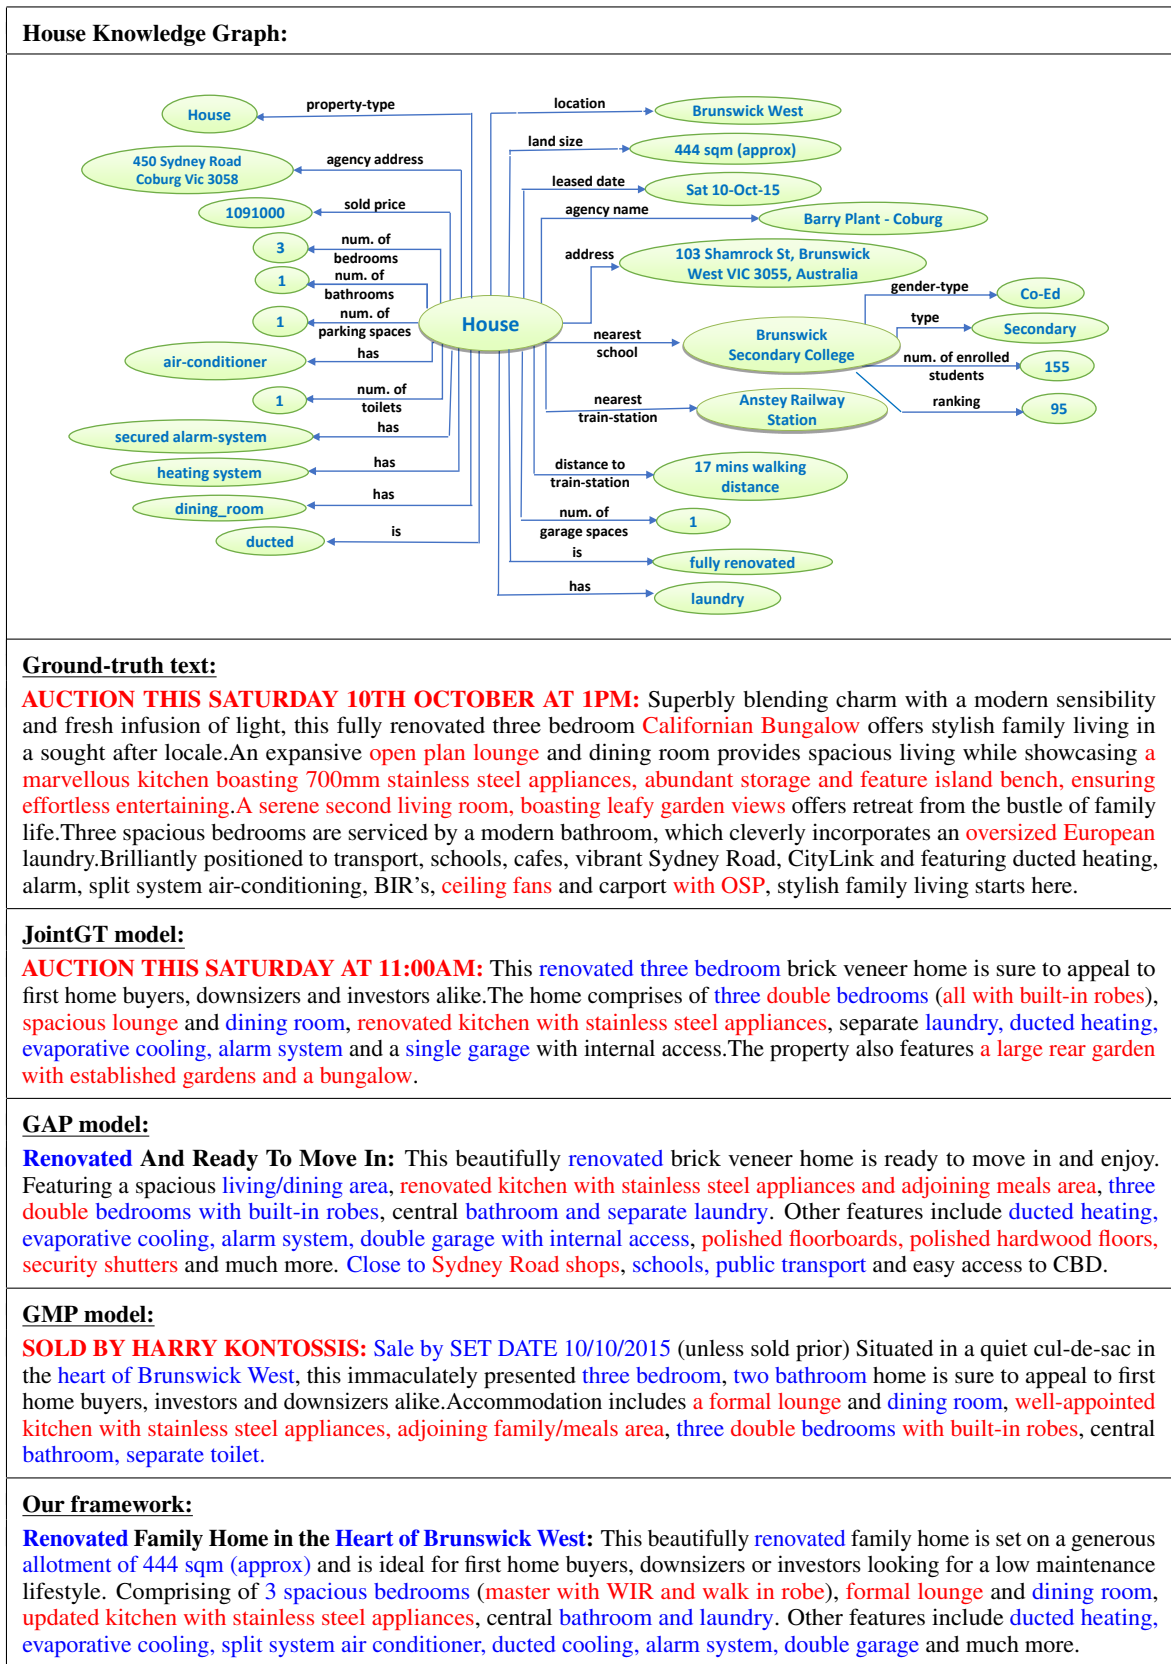

Figure 9: Example of generated text on the House dataset. Here red colored text represents hallucinated information and blue colored text represents the faithful information

| Genwiki Knowledge Graph:                                                                                                                                                                                                                                                                                                                                                                                                                                |
|---------------------------------------------------------------------------------------------------------------------------------------------------------------------------------------------------------------------------------------------------------------------------------------------------------------------------------------------------------------------------------------------------------------------------------------------------------|
| <pre> graph TD     Montana[Country Dick Montana] -- formerBandMember --&gt; BeatFarmers[The Beat Farmers]     Montana -- birthDate --&gt; BirthDate[May 11, 1955]     Montana -- deathDate --&gt; DeathDate[November 8, 1995]     Montana -- name --&gt; Name[Daniel Monte McLain]     Montana -- hometown --&gt; Hometown[California]     Montana -- occupation --&gt; Occupation[musician]     Montana -- birthPlace --&gt; BirthPlace[Carmel] </pre> |
| <p><b>Ground-truth text:</b><br/> Daniel Monte McLain ( May 11 , 1955 – November 8 , 1995 ) , known by the stage name Country Dick Montana , was a musician best known as a member of The Beat Farmers . Montana was born in Carmel , California .</p>                                                                                                                                                                                                  |
| <p><b>JointGT model:</b><br/> Montana was born on May 11 , 1955 in Carmel , California .</p>                                                                                                                                                                                                                                                                                                                                                            |
| <p><b>CycleGT model:</b><br/> Daniel Monte McLain ( May 11 , 1955 in Carmel , Montana – November 8 , 1995 in Carmel , California ) was a musician , best known as <b>the founder of the band Country Dick Montana</b> .</p>                                                                                                                                                                                                                             |
| <p><b>GMP model:</b><br/> Daniel Monte McLain ( May 11 , 1955 – November 8 , 1995 ) , known professionally as Country Dick Montana , was an American singer, <b>songwriter</b>, and musician.</p>                                                                                                                                                                                                                                                       |
| <p><b>Our framework:</b><br/> Daniel Monte McLain ( May 11 , 1955 – November 8 , 1995 ) was an American musician .</p>                                                                                                                                                                                                                                                                                                                                  |

Figure 10: Example of generated text on the Genwiki dataset. Here **red** colored text represents **hallucinated information** and **blue** colored text represents **faithful information**.
